# Supplementary material for: Combination of mild hypothermia with neuroprotectants has greater neuroprotective effects during oxygen-glucose deprivation and reoxygenation-mediated neuronal injury
Source: PubMed Central journal article supplement (PMC4665348; doi:10.1038/srep07091), 2014-11-18
Supplement: srep07091-s1.pdf [file srep07091-s1.pdf]

# **Combination of mild hypothermia with neuroprotectants has greater neuroprotective effects during oxygen-glucose deprivation and reoxygenation-mediated neuronal injury**

Xiao-Ya Gao<sup>1,2</sup>, Jian-Ou Huang<sup>1,3</sup>, Ya-Fang Hu<sup>1</sup>, Yong Gu<sup>1</sup>, Shu-Zhen<sup>1</sup>, Kai-Bin Huang<sup>1</sup>, Jin-Yu Chen<sup>1</sup>, & Su-Yue Pan<sup>1,\*</sup>

<sup>1</sup>Department of Neurology, Nanfang Hospital, Southern Medical University, Guangzhou, Guangdong, P. R. China, <sup>2</sup>Department of Neurology, Zhujiang Hospital, Southern Medical University, Guangzhou, Guangdong, P. R. China, & <sup>3</sup>Department of Neurology, the 421 Hospital, Guangzhou, Guangdong, P. R. China.

## **\* Corresponding Author:**

Correspondence and requests for materials should be addressed to S.Y.P (pansuyue82@126.com)

Su-Yue Pan, M.D., Ph.D., Department of Neurology, Nanfang Hospital, Southern Medical University, 1838 North Guangzhou Avenue, Guangzhou, Guangdong, 510515, P. R. China.

Tel: +86-20-61641961; Fax: +86-20-62787664

E-mail addresses: pansuyue82@126.com

## Supplementary Chart 1: time of management in the experiment

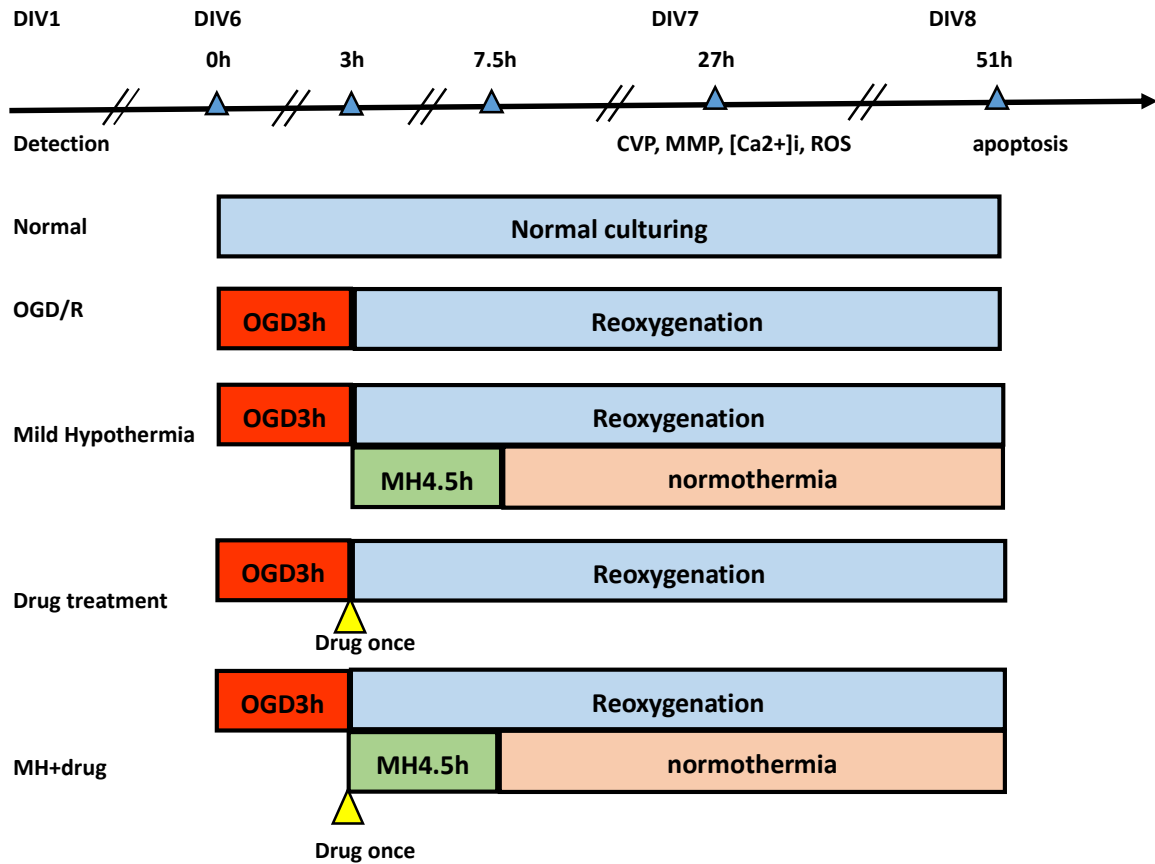

### Supplementary Chart 1.

It shows the time of management in the experiment. The cultured cortical neurons (DIV 6) were subjected to OGD for 3 hrs. While glucose recovery and reoxygenation initiated, cells were immediately treated with a drug (24 hrs or 48 hrs), mild hypothermia (MH, 4.5 hrs at 34 °C, then 19.5 hrs or 43.5 hrs at 37 °C), or combination of both of them. 24 hrs after OGD (DIV 7), CVP, MMP, [Ca<sup>2+</sup>]<sub>i</sub>, or ROS were detected, and the apoptosis detected was made 48 hours after OGD (DIV8).

Abbreviation: OGD: oxygen glucose deprivation; CVP: cell viability proportion; MMP: Mitochondrial Membrane Potential; [Ca<sup>2+</sup>]<sub>i</sub>: intracellular free calcium concentration; ROS: reactive oxygen species; DIV: days in vitro.
